# Supplementary material
Source: HighWire-hosted journal article supplement (https://qualitysafety.bmj.com/content/27/3/218)
Supplement: inline-supplementary-material-2 [file inline-supplementary-material-2.docx]

**Leadership Saves Lives: Survey of Organizational Culture**

Reference: Bradley EH, Brewster AL, Fosburgh H, Cherlin EJ, Curry LA. Development and Psychometric Properties of a Scale to Measure Hospital Organizational Culture for Cardiovascular Care. Circulation: Cardiovascular Quality and Outcomes. 2017. https://doi.org/10.1161/CIRCOUTCOMES.116.003422

| Factor | Item |
| --- | --- |
| Learning and Problem Solving | Clinicians are encouraged to creatively solve problems related to AMI care. |
| There is good coordination among the different clinical units involved with the care of patients with AMI. |
| The clinicians who care for patients with AMI hold each other accountable for high quality care. |
| We rely on data to guide our improvement processes. |
| Our hospital has frequent interactions with outside organizations (e.g., other hospitals and professional associations) to acquire new knowledge on how to improve AMI care. |
| In this work environment, people are interested in better ways of doing things. |
| In this work environment, people often resist new approaches. |
| In this work environment, people value new ideas. |
| Despite the workload, people in this work environment find time to review how the work is going. |
| In this work environment, someone makes sure that we stop to reflect on the team’s work process. |
| Psychological Safety | If you make a mistake in this work environment, it is held against you. |
| People in this work environment are able to bring up problems and tough issues. |
| In this work environment, someone would deliberately act to undermine my efforts. |
| It is difficult to ask others in this work environment for help. |
| In this work environment, people’s unique skills and attributes are valued and utilized. |
| People in this work environment speak up to challenge assumptions. |
| Senior Leadership Support | Senior management has set reducing 30-day AMI mortality as a priority. |
| Opinion leaders have indicated that current practices for patients with AMI can be improved. |
| Opinion leaders have encouraged changes in practices to improve AMI care. |
| The necessary financial resources for personnel and equipment are provided for the care of patients with AMI. |
| Commitment to the Organization | I would be very happy to spend the rest of my career at this hospital. |
| I enjoy discussing my hospital with people outside of it. |
| I think I could easily become as attached to another hospital as I am to this one. |
| I do not feel like ‘part of the family’ at this hospital. |
| I do not feel ‘emotionally attached’ to this hospital. |
| This hospital has a great deal of personal meaning to me. |
| I do not feel a strong sense of belonging to my hospital. |
| Time for Improvement | In this work environment, people caring for patients with AMI are overly stressed. |
| In this work environment, the time pressure gets in the way of doing a good job. |
| In this work environment, people are too busy to invest time in improvement. |
| There is simply no time for reflection in this work environment. |
